# Supplementary figures and images for: Separation, identification and mutagenic assessment of the photodegradation products of Ponceau 4R (E124) in a beverage
Source: Royal Society of Chemistry journal article supplement (doi:10.1039/c6ay00716c), 2016-01-01

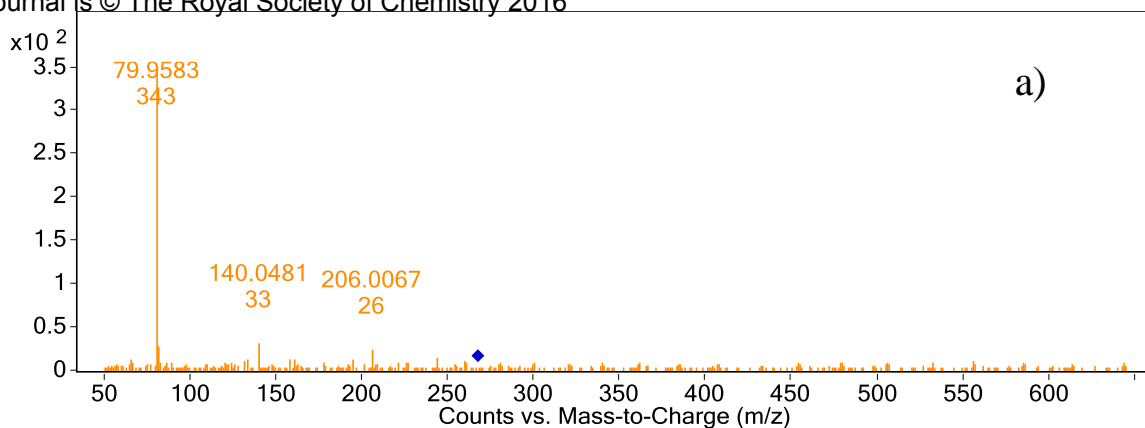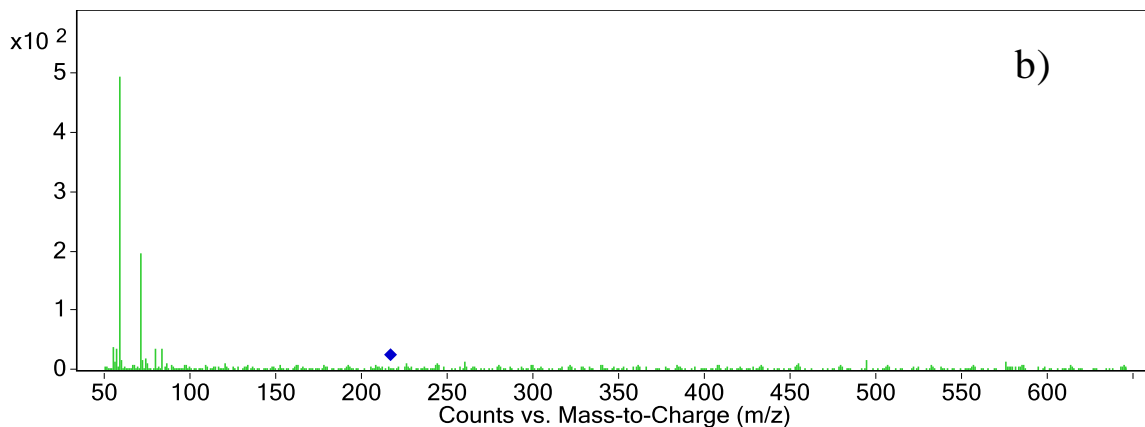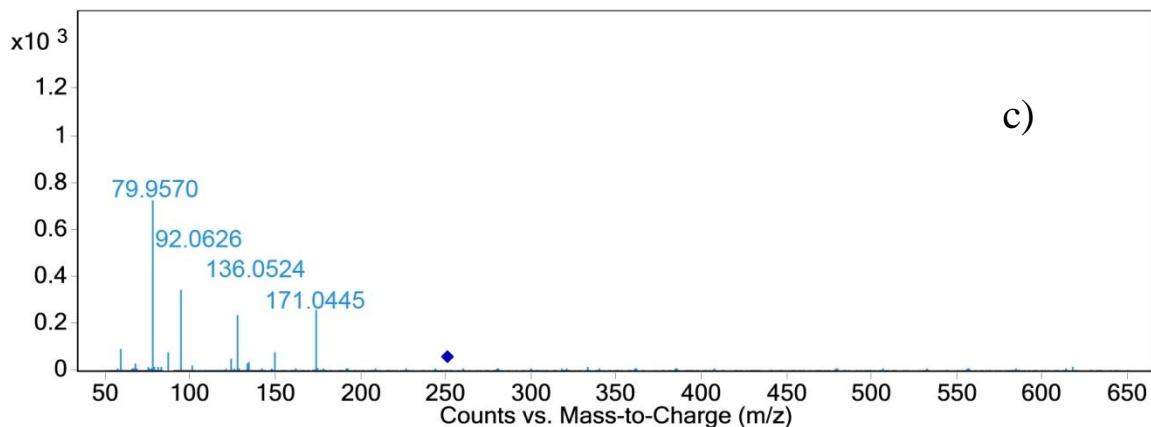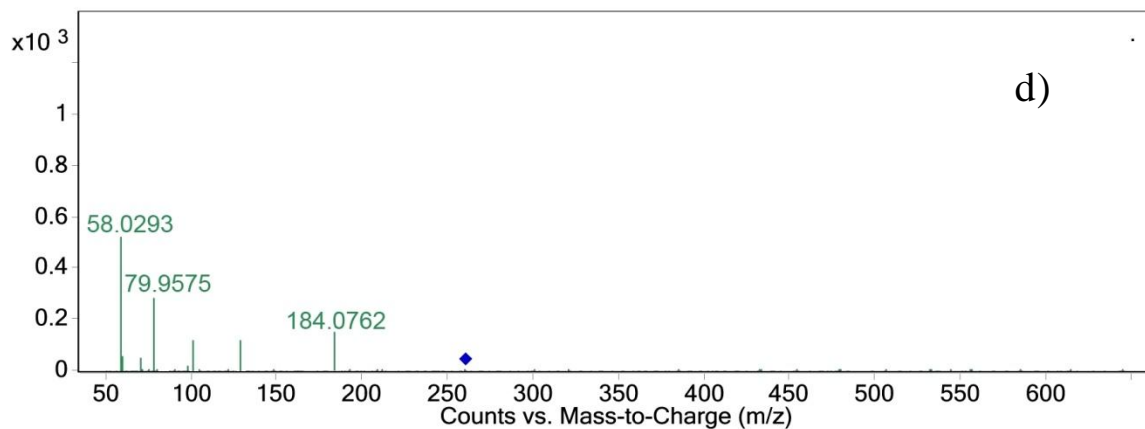

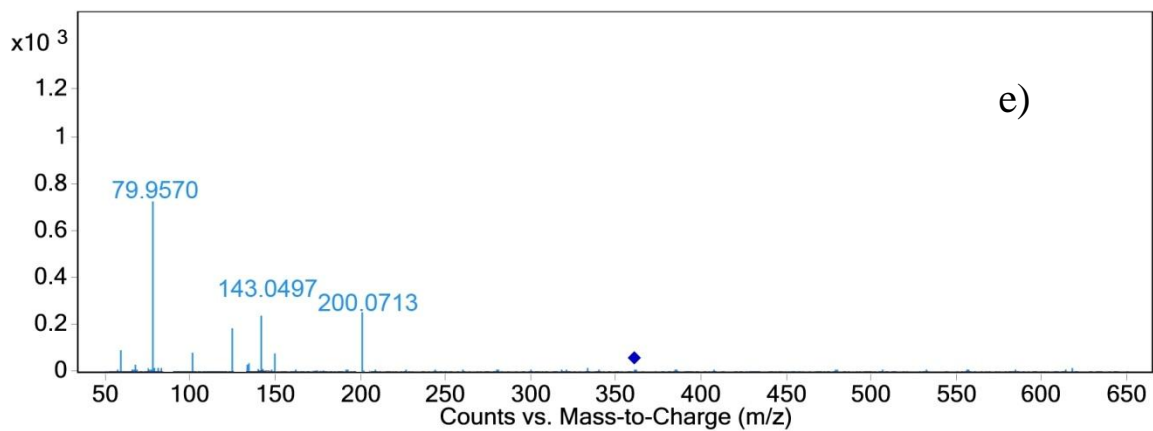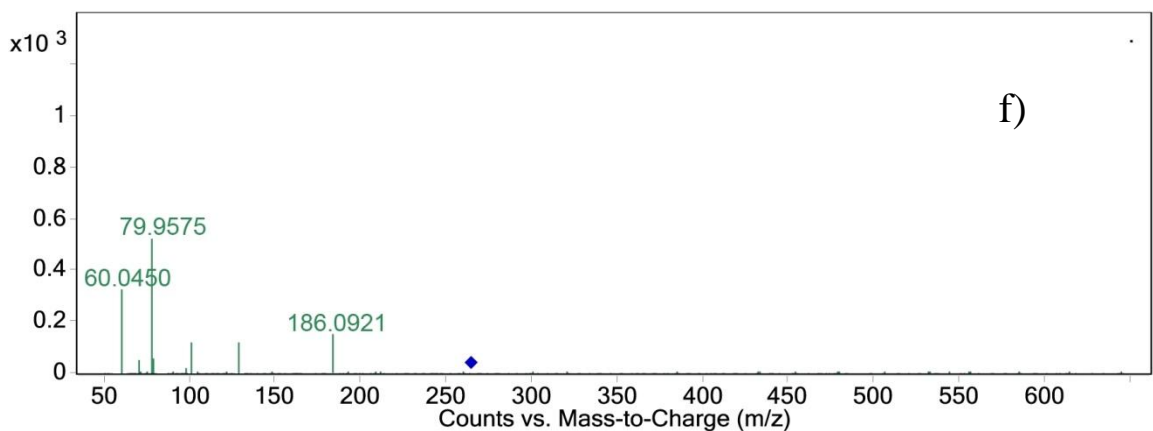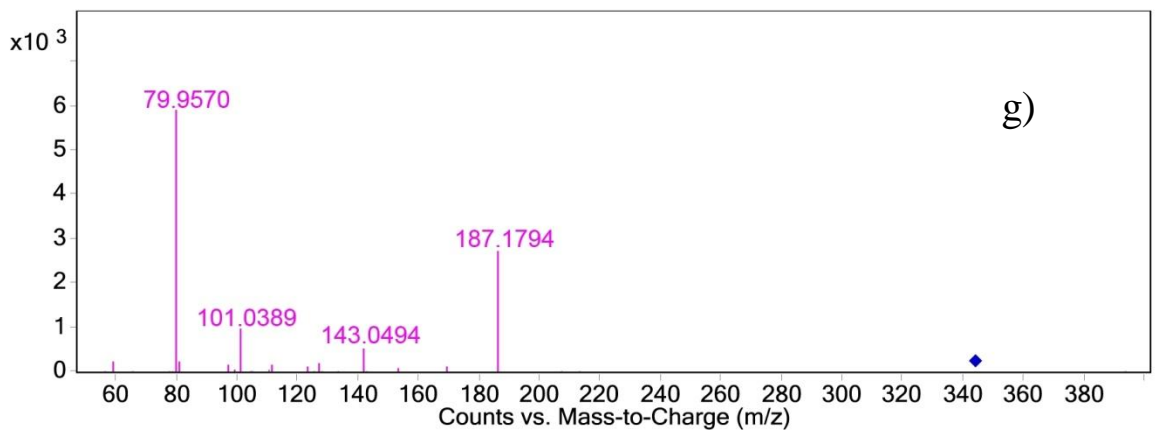

Supplement: c6ay00716c1.pdf [file c6ay00716c1.pdf]
